# Supplementary material for: Ion-neutral clustering alters gas-phase hydrogen–deuterium exchange rates
Source: Royal Society of Chemistry journal article supplement (doi:10.1039/d2cp04388b), 2023-01-01
Supplement: d2cp04388b1.csv [file d2cp04388b1.csv]

Analytes	Set Voltage	Modifier Flow Rate	Date	Drift time: Cocaine	Drift time: Methionine	Temperature	Pressure	Drift Tube Voltage	Reduced Mobility: Cocaine	Reduced Mobility: Methionine	Isotope_1	Isotope_2	Isotope_3	Isotope_4	Isotope_5	Modifier flow rate in torr	Ln(remaining Hs)	Torr x s	Average m/z	Ki/Ko
MnCoc2	11kV	0	20210619	14.945980087918526	12.517258323631765	296.45	691.6	5901	1.1646070893279663	1.3905756290483178	924937.1039750201	169954.92088022368	48957.217012979505	1623.9669628110041	0.04966147465746145	0.0	1.3249231576364031	0.0	150.23810372910796	1.0
MnCoc2	11kV	5	20210619	14.924041066910311	12.613624667430472	296.45	691.6	5901	1.1663191148634449	1.3799518240216004	803679.7669843929	332971.43106581684	72406.931130701	9624.955608236376	171.40404452409638	0.01654	1.2764102887209132	0.00043542989078278194	150.41624802712548	0.9923601386326697
MnCoc	11kV	10	20210619	14.883954592854847	12.984537793348267	296.45	691.6	5901	1.1694603244557404	1.340532458249026	658457.1874392858	354731.0605555941	76223.69290993783	14398.134813126595	147.49335353012034	0.03309	1.2530258737245612	0.0008967390688418644	150.4990797107287	0.9640126220006168
MnCoc	11kV	20	20210619	14.977629630636583	13.015902672777738	296.45	691.6	5901	1.1621461337073222	1.337302129935938	367995.021590321	423193.96219952684	106780.72862589818	30584.038745968563	1973.4787821609787	0.06618	1.1658406663402894	0.0017978103847334974	150.79138087217746	0.9616896068077656
MnCoc	11kV	40	20210619	14.987961071125756	13.122239775964875	296.45	691.6	5901	1.1613450478516052	1.3264651968352454	334226.9224571571	618137.3265206143	204497.1475361002	78026.76538518058	10901.905725764742	0.1324	1.0826918407539423	0.0036260917076619092	151.04738316234867	0.9538964793616093
MnCoc	11kV	60	20210619	15.048128046903386	13.29979781738764	296.45	691.6	5901	1.1567016384424236	1.308756313918423	222166.01721375278	584571.190552421	202261.24834584683	90562.14297266623	17671.653989685747	0.1985	1.0325598578972661	0.005509959154495701	151.19175464945357	0.9411615496340244
MnCoc2	11kV	80	20210619	15.070266855164016	13.54455802065361	296.45	691.6	5901	1.155002398738552	1.2851061172171476	203238.7144420119	743141.7058518871	296130.99926536717	142144.67645811464	37069.365904196755	0.2647	0.9770023075991572	0.0074827564272088865	151.34351901863815	0.9241540628010636
MnCoc	11kV	120	20210619	15.039360960188109	13.51362868886468	296.45	691.6	5901	1.1573759292979175	1.288047405186392	149069.8354957899	735613.7645257245	389921.59222629055	209094.03121425645	77152.58686474053	0.3971	0.8876771359008694	0.01119991426628502	151.57052025942602	0.92626922137842
MnCoc	11kV	160	20210619	15.101720364918954	13.607117112308417	296.45	691.6	5901	1.1525967867726405	1.2791978068300474	95478.86001479886	641485.1804628528	468035.3306524389	287311.98082675406	134026.73221125445	0.5294	0.7748971601343544	0.01503463499844736	151.82963108474155	0.9199052393184144
MnCoc	11kV	240	20210619	15.133698642712659	13.794708845106397	296.45	691.6	5901	1.1501612909231644	1.2618022288683024	49332.69840004076	523252.6263805377	488384.49375606736	366919.36178791313	222245.61571327754	0.7941	0.6340155621563931	0.02286286037125648	152.11483460047558	0.9073956155350247
MnCoc	11kV	300	20210619	15.164161121029368	13.887506899341066	296.45	691.6	5901	1.147850792959853	1.253370708904593	42476.54782601659	539442.6628963891	548662.481940495	431112.57873572444	279064.47193532204	0.9927	0.5887839397750122	0.02877299955604832	152.1982040098297	0.9013322847908494
MnCoc2	115kV	0	20210619	14.323411012585893	12.081485810615927	296.45	691.6	6163	1.163565461463347	1.3794848254462362	989221.9698350312	227551.46208542222	61685.84115602089	3359.6056204045867	0.09247807888645468	0.0	1.3132846335133421	0.0	150.2816328508854	1.0
MnCoc2	115kV	5	20210619	14.229769242278335	12.050154697509226	296.45	691.6	6163	1.1712225307963078	1.3830715673744514	875601.3718357891	381316.6073306267	84388.30056654474	12502.756669881259	229.29616378578137	0.01654	1.2712651460654731	0.00041597856937984645	150.4346395880927	1.0026000589945272
MnCoc	115kV	10	20210619	14.260882978682185	12.205821239396105	296.45	691.6	6163	1.1686672115255503	1.365432609384444	766465.7758133364	379167.49164534034	83955.01844271914	14395.84210633842	128.46228119338187	0.03309	1.2599202431419514	0.0008429592910325585	150.47485967796317	0.989813431940256
MnCoc	115kV	20	20210619	14.354669066506544	12.48638242010656	296.45	691.6	6163	1.1610317359022686	1.3347521951395158	402978.2026114422	425730.85682869377	107397.88029643674	30824.597716342898	864.6169751089784	0.06618	1.175275484912413	0.0017246708543365798	150.76096487375102	0.9675729449997754
MnCoc	115kV	40	20210619	14.354749252741014	12.611005308807183	296.45	691.6	6163	1.1610252503300469	1.321562075067041	367158.91634503944	706623.7035771194	232704.2001947947	91637.57486584915	14367.920871384198	0.1324	1.076680389543676	0.0034848213838695554	151.06507943099143	0.9580113174782778
MnCoc	115kV	60	20210619	14.32317130660743	12.641755544527426	296.45	691.6	6163	1.1635849343574065	1.3183474625724307	285151.2087599429	803632.7978478619	339240.282911172	147987.33846152443	39417.74729034742	0.1985	0.996984617019528	0.005237339518079043	151.28990248667898	0.9556810181989289
MnCoc2	115kV	80	20210619	14.354812734144646	12.735614768471066	296.45	691.6	6163	1.161020115918759	1.3086314753998722	184215.6247146471	710331.3878431555	360345.6285093033	177805.12712219823	58737.24282248474	0.2647	0.9263684204821558	0.007035851824616021	151.47467840119043	0.9486378184526646
MnCoc	115kV	120	20210619	14.386124761245869	12.891462448389156	296.45	691.6	6163	1.1584931050705947	1.2928111462381997	158192.85189136845	812416.0890665925	485580.3211109998	261773.344845412	105482.81744639648	0.3971	0.8585738832339739	0.010684271228198249	151.6402070474135	0.9371695305310812
MnCoc	115kV	160	20210619	14.38578039075464	12.984568015031783	296.45	691.6	6163	1.158520837374915	1.2835410716240063	96191.00048999814	642131.2784630915	487559.3230917612	304181.71649748704	147658.09445345812	0.5294	0.7608432556591226	0.014346774493616354	151.8599199055229	0.9304495764995502
MnCoc	115kV	240	20210619	14.448379332764027	13.140551893160387	296.45	691.6	6163	1.1535014385174218	1.2683048992229473	57325.04606885267	592155.0126774062	567995.5108817199	434687.1730031151	269665.9594790684	0.7941	0.6210916659237623	0.021778683878576538	152.13904152167814	0.919404748662368
MnCoc	115kV	300	20210619	14.510474449878682	13.296078519524027	296.45	691.6	6163	1.1485652245318576	1.2534693082713013	50717.50574059598	618437.7901227893	614735.2082165581	478718.88522268995	310700.50801811105	0.9927	0.5969660739496566	0.027547641496228563	152.18340099574417	0.9086503056427813
MnCoc2	12kV	0	20210619	13.731957989236719	11.552282117929302	296.45	691.6	6451	1.1594978172958663	1.378270990370558	1202226.9453649656	248608.57160373853	72926.78278696175	3549.407547325934	0.09922573324569059	0.0	1.3176824071432314	0.0	150.26524430374397	1.0
MnCoc2	12kV	5	20210619	13.669458823603417	11.645507061566462	296.45	691.6	6451	1.1647992448849012	1.367237616322117	976880.0615752782	506572.94573460054	111990.29363140445	21998.90125867454	476.63421083245254	0.01654	1.2546159516074766	0.0004020098902277688	150.49350854668833	0.9919947716192774
MnCoc	12kV	10	20210619	13.638435380062376	12.050398383753745	296.45	691.6	6451	1.1674488218050778	1.3212986665390802	895394.034025039	410856.33948671166	87984.74824493699	14219.144784132908	97.67367617998312	0.03309	1.267742112264377	0.0008322254667668327	150.44717837308622	0.9586639171617766
MnCoc2	12kV	20	20210619	13.732174887624408	11.894990492227944	296.45	691.6	6451	1.1594795031388476	1.3385614159273083	449006.8070568861	562611.081971523	153126.29320529808	50307.22871335819	5176.503081463522	0.06618	1.146544154865138	0.0016429853519079698	150.85270247868118	0.9711888484044974
MnCoc	12kV	40	20210619	13.763323660898129	12.112970371242925	296.45	691.6	6451	1.1568554012105172	1.314473232223775	420165.5371119753	798573.8851281842	251628.2445474024	98347.54648515847	15707.270235224234	0.1324	1.0826480914162728	0.003347198509416716	151.04751233455409	0.9537117456635793
MnCoc	12kV	60	20210619	13.76294886129754	12.206054193729944	296.45	691.6	6451	1.1568869052832769	1.3044490105490008	344696.8860419803	920905.7396642398	349009.27473621053	149481.61663348018	37055.20468100178	0.1985	1.0188118367988739	0.005056833266825047	151.23009828727524	0.9464387044802346
MnCoc	12kV	80	20210619	13.856478644850384	12.268432777687757	296.45	691.6	6451	1.1490780395086755	1.2978165674653823	262381.8046283749	852888.8143740487	322467.375413468	151017.85348531467	39731.73111948475	0.2647	0.9948947119236082	0.006777754879785529	151.29556041895242	0.9416265571376897
MnCoc	12kV	120	20210619	13.794401398223842	12.393164235876046	296.45	691.6	6451	1.1542490939671102	1.2847546447925375	195047.008622343	954137.7360292437	510123.74718772434	267491.75565591484	103721.95465333035	0.3971	0.887115048697261	0.010271288350861342	151.57188545518414	0.9321495219507756
MnCoc	12kV	160	20210619	13.82553034792936	12.424294164017603	296.45	691.6	6451	1.151650238003576	1.2815356031919487	114774.03015732324	742661.2697955901	536381.6694040555	330838.419651745	161104.82125763304	0.5294	0.7743805939958954	0.013727722509301973	151.83075193430975	0.9298139568673638
MnCoc	12kV	240	20210619	13.855892373093175	12.610418901354462	296.45	691.6	6451	1.1491266594014442	1.2626206504534385	62808.27001443349	620422.0287580764	561214.8155906119	426828.1844264859	269441.20072141924	0.7941	0.6348868779496375	0.020900060291377382	152.1131913102817	0.9160902748986787
MnCoc	12kV	300	20210619	13.893377002681625	12.76941841370064	296.45	691.6	6451	1.1460262909906853	1.2468990207600368	68547.63434901834	763483.6899707578	717378.6854267602	532350.3333174619	331059.90665396396	0.9927	0.6303117350101318	0.0264564743702008	152.12180401254133	0.904683497999765
